# Supplementary material for: Simultaneous molecular docking of different ligands to His6-tagged organophosphorus hydrolase as an effective tool for assessing their effect on the enzyme
Source: PubMed Central journal article supplement (PMC6745196; doi:10.7717/peerj.7684), 2019-09-12

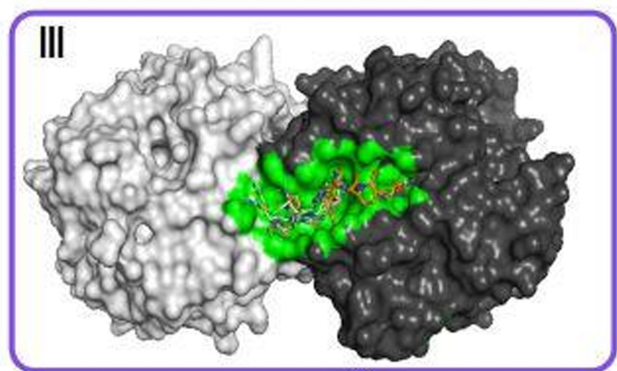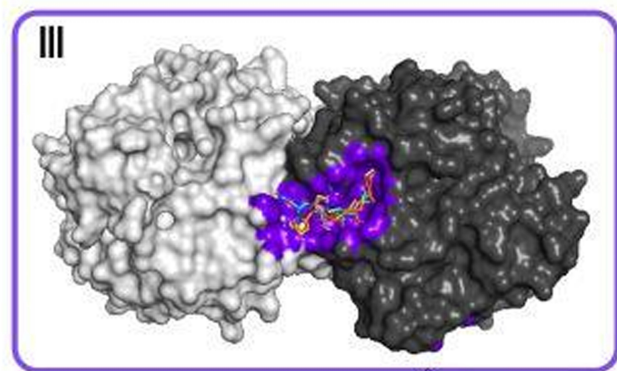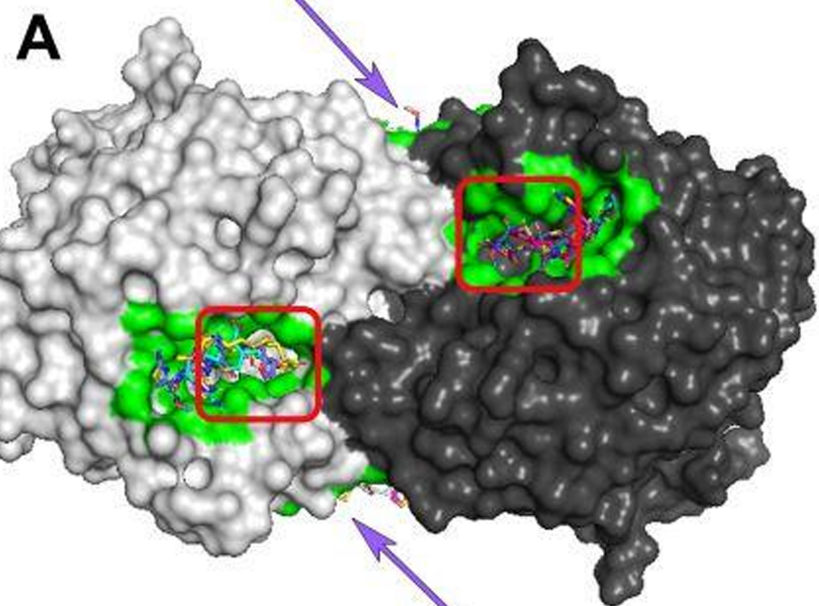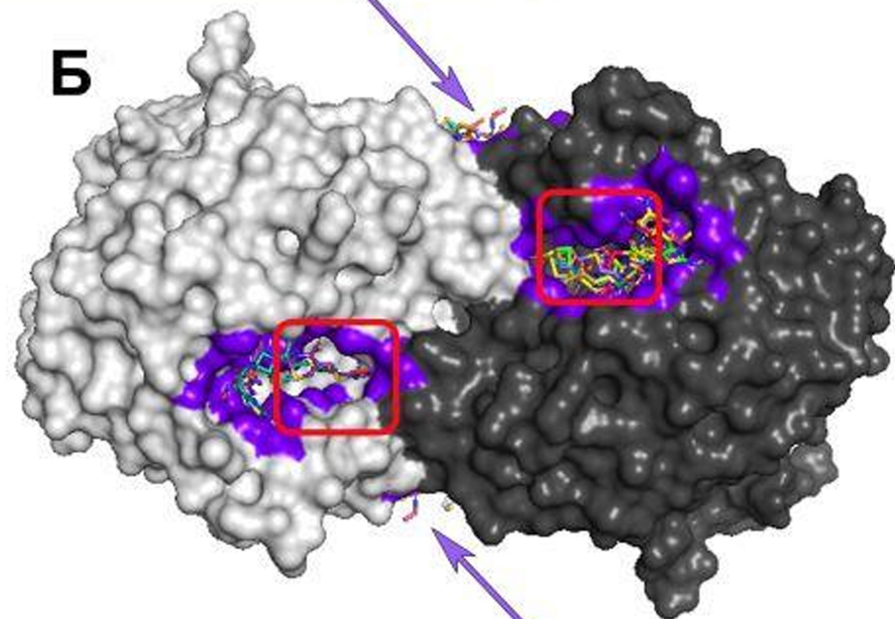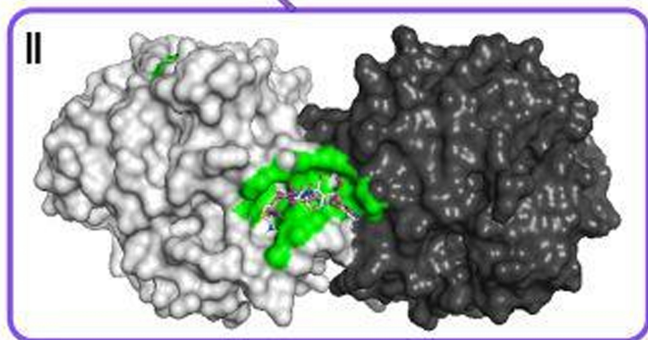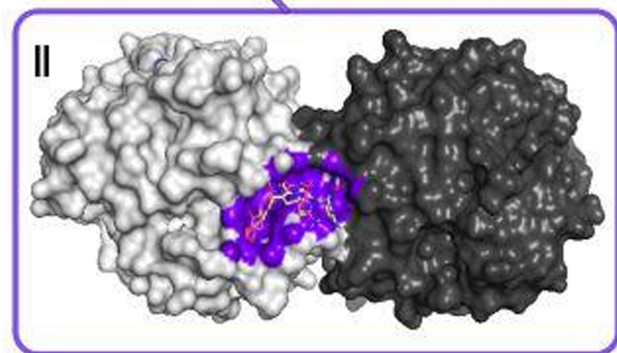

Supplement: peerj-07-7684-s003.pdf [file peerj-07-7684-s003.pdf]
